# Supplementary material for: Vocal music enhances memory and language recovery after stroke: pooled results from two RCTs
Source: PubMed Central journal article supplement (PMC7664275; doi:10.1002/acn3.51217), 2020-10-06
Supplement: ACN3-7-2272-s001.pdf [file ACN3-7-2272-s001.pdf]

Supplementary Material / Supplementary Figure 1

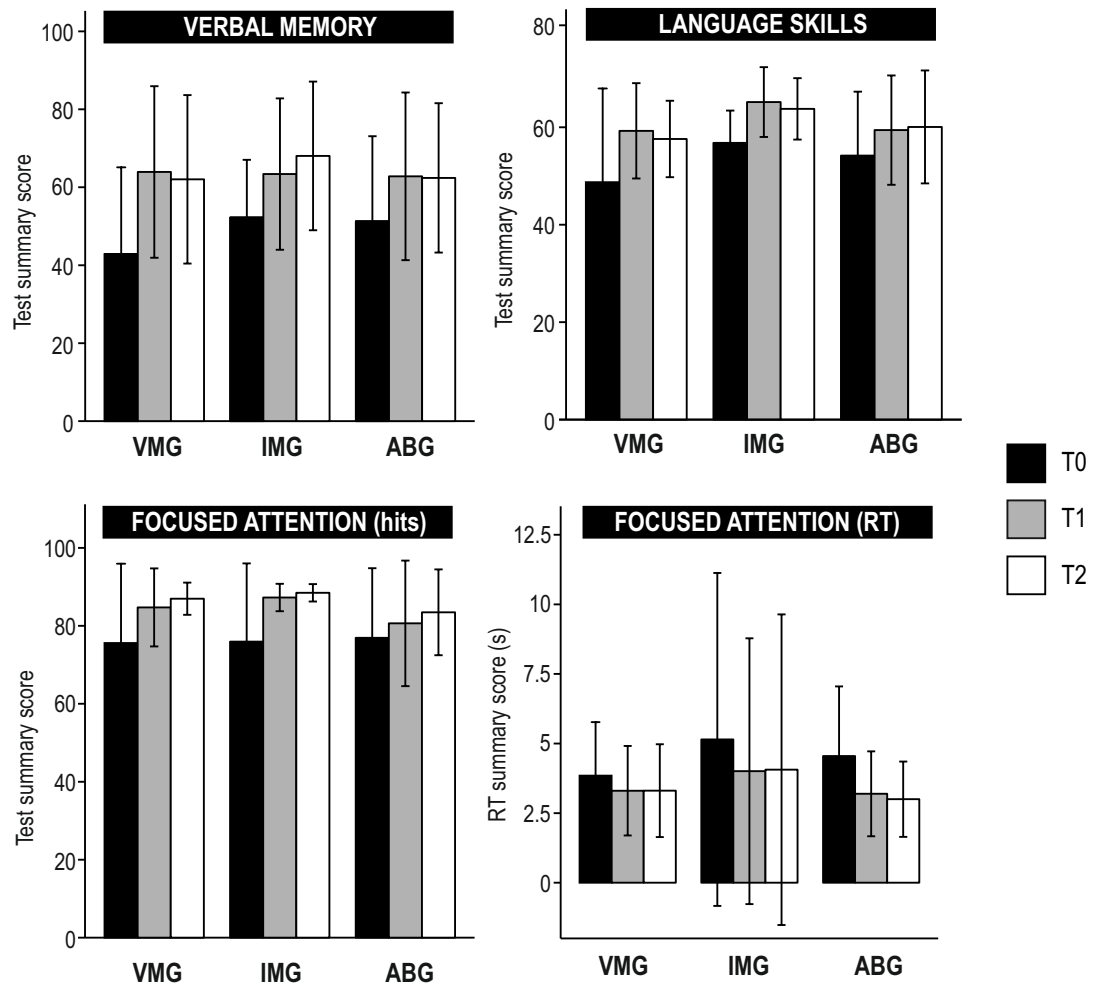

**Supplementary Figure 1.** Bar charts displaying the cognitive domain scores (mean  $\pm$  SD) of the patients at the acute (T0), 3-month (T1) and 6-month (T2) post-stroke stages. ABG = Audio book group, IMG = Instrumental music group, RT = reaction time, VMG = Vocal music group.
